# Supplementary material for: Gene Ontology Analysis for Drug Targets of the Whole Genome Transcriptome of Human Vascular Endothelial Cells in Response to Proinflammatory IL-1
Source: PubMed Central journal article supplement (PMC6491677; doi:10.3389/fphar.2019.00414), 2019-04-24

*Supplementary Material*

**Gene Ontology Analysis for Drug Targets of the Whole Genome Transcriptome of Human Vascular Endothelial Cells in Response to Proinflammatory IL-1**

**Tom Skaria<sup>1</sup>, Esther Bachli<sup>2</sup>, Gabriele Schoedon<sup>1\*</sup>**

<sup>1</sup>Inflammation Research Unit, Division of Internal Medicine, University Hospital Zürich, Zürich, Switzerland, <sup>2</sup>Department of Medicine, Uster Hospital, Uster, Switzerland.

**\*Correspondence**

Gabriele Schoedon

Email: [klinsog@usz.uzh.ch](mailto:klinsog@usz.uzh.ch)

## Supplementary Methods

### Supplementary Results

Supplementary Table S1. Genes regulated ( $\geq 2$  fold up or down) by 4 h IL-1 $\beta$  treatment in HCAEC. Data are from 3 independent array experiments.

Supplementary Table S2. Genes that encode direct targets for known drugs and are upregulated by IL-1 $\beta$  in HCAEC. Data are from 3 independent array experiments.

Supplementary Table S3. Genes that encode direct targets for known drugs and are downregulated by IL-1 $\beta$  in HCAEC. Data are from 3 independent array experiments.

Supplementary Table S4. The targets of most significant pathways regulated by 4 h IL-1 $\beta$  treatment in HCAEC. Data are from 3 independent array experiments.

Supplementary Table S5. GO listing of disease states in which either HGF or IL-1 $\beta$  are involved.

Supplementary Table S6. GO listing of disease states in which both HGF and IL-1 $\beta$  are involved.

Supplementary Table S7. GO listing of pathways associated with HGF.

Supplementary Table S8. Targets involved in ‘Lupus Erythematosus, Systemic’ that were regulated by IL-1 $\beta$  in HCAEC as listed by Metacore GO biomarker assessment work flow centering immune system diseases. Data are from 3 independent array experiments.

Supplementary Figure S1. The ten biological pathways most significantly ( $P < 0.05$ ) regulated by 4 h IL-1 $\beta$  treatment in HCAEC. Pathways represented as histograms are ranked by the  $-\log$  value ( $P$  value). Data are from 3 independent experiments.

Supplementary Figure S2. Metacore™ GO biomarker assessment work flow centering immune system diseases showing the top 10 disease profiles enriched in 4 h IL-1 $\beta$  transcriptome. Diseases represented as histograms are ranked by the  $-\log$  value ( $P$  value). Data are from 3 independent experiments.

## **Supplementary Methods**

### **Cell culture**

HCAEC (Cat. No. CC-2585) were propagated in EBM-2 medium (Clonetics, Lonza) added with EGM-2MV Single Quots and 5% FBS (Clonetics, Lonza) in a Class 100 HEPA air filtered system (SteriCult, Fisher Scientific, Switzerland) as described previously (Skaria et al., 2017b; Skaria et al., 2017a). HCAEC used in this study were tested positively and functionally for CD31 (PECAM-1), CD105 (endoglin), von Willebrand Factor VIII, and acetylated low-density lipoprotein uptake as certified by the manufacturer (Lonza, Cell Systems). To prevent masked low-level contamination in cultures, antibiotic-free culture medium was used during the whole study period. Experiments were conducted using only cells from passages 3- 6. HCAEC monolayers were treated with recombinant human IL-1 $\beta$  (20 U/mL, Cat. No. 200-01B, PeproTech) for 4 h. For all pipetting steps, TipOne aerosol barrier sterile filter pipet tips (USA Scientific) were used.

### **Differential gene expression profiling**

Gene expression profiling through competitive two-colour hybridization of cRNA probes onto 4 $\times$ 44K Human Whole Genome Oligonucleotide microarrays (Agilent Technologies) was carried out as described previously (Schaer et al., 2013; Skaria et al., 2016; Skaria et al., 2017b). After total RNA was isolated using RNeasy Mini Kit (Qiagen, Basel, Switzerland), it was then quantified by Nanodrop spectrophotometry. RNA integrity was verified using the Agilent 2100 Bioanalyzer System (Agilent Tech., Basel, Switzerland). Microarray experiments were conducted using only RNA samples that showed a RNA integrity number (RIN) >9. 500 ng of total RNA from every sample was reverse transcribed and labelled with Cy3- and Cy5-CTP utilizing the two-colour Quick Amp Labelling Kit (Agilent Tech., Switzerland) consisting of internal control probes and spike in's (labelled Spike A mix with Cy-3 and Spike B mix with Cy-5) for control of reaction performance and background normalization of arrays. cRNA fragmentation and hybridization onto the Human GE 4 $\times$ 44K V2 Microarray chips were carried out according to the Quick Amp Labelling protocol (Agilent Techno., version 5.7, 2008). To prevent ozone-induced deterioration of cyanine dyes, array chips were washed with stabilization and drying solution (Agilent Tech., Switzerland). Scanning, feature extraction and pre-processing along with data normalization of the microarrays were carried out using the Microarray Scanner and Feature Extraction Software 10.7 (Agilent Tech. Inc.) with default settings for Agilent 4 $\times$ 44 K two-colour arrays. Spot values were normalized using the default linear-lowess normalization. The pre-processed data was further analysed using GeneSpring GX 9.0 Software (Agilent Tech. Inc.) with default settings for two-colour arrays to select genes that were consistently regulated  $\geq 2$ -fold in their expression in three independent microarray experiments (Supplementary Table S1). Gene ontology analysis was performed using Metacore GeneGO software version 6.32.69020 (Thomson Reuters, <http://portal.genego.com>). Genes regulated  $\geq 2$ -fold in their expression as found from GeneSpring analysis and satisfying a *P* value < 0.05 and FDR cut off (0.05) were grouped into pathways according to their biological functions and gene ontology classes.

### **References**

Schaer, C.A., Deuel, J.W., Bittermann, A.G., Rubio, I.G., Schoedon, G., Spahn, D.R., Wepf, R.A., Vallelian, F., and Schaer, D.J. (2013). Mechanisms of haptoglobin protection against hemoglobin peroxidation triggered endothelial damage. *Cell Death and Differentiation* 20, 1569-1579.

- Skaria, T., Bachli, E., and Schoedon, G. (2017a). WIF1 prevents Wnt5A mediated LIMK/CFL phosphorylation and adherens junction disruption in human vascular endothelial cells. *Journal of Inflammation (London, England)* 14, 10.
- Skaria, T., Bachli, E., and Schoedon, G. (2017b). Wnt5A/Ryk signaling critically affects barrier function in human vascular endothelial cells. *Cell Adh Migr* 11, 24-38.
- Skaria, T., Burgener, J., Bachli, E., and Schoedon, G. (2016). IL-4 Causes Hyperpermeability of Vascular Endothelial Cells through Wnt5A Signaling. *PLOS ONE* 11, e0156002.

**Supplementary Results**

Supplementary Table S1. Genes regulated ( $\geq 2$ -fold up or down) by 4 h IL-1 $\beta$  treatment in HCAEC. Data are from 3 independent array experiments.

| Upregulated genes | Downregulated genes |
|-------------------|---------------------|
| <i>ABCA1</i>      | <i>ACOT6</i>        |
| <i>ABTB2</i>      | <i>ACSM5</i>        |
| <i>ACOXL</i>      | <i>AKAP5</i>        |
| <i>ADAMTS9</i>    | <i>ANKRD23</i>      |
| <i>ADAP1</i>      | <i>ARHGAP18</i>     |
| <i>AMPD3</i>      | <i>ATXN3L</i>       |
| <i>APOBEC3G</i>   | <i>BIN2</i>         |
| <i>APOL2</i>      | <i>C10orf107</i>    |
| <i>APOL3</i>      | <i>C10orf68</i>     |
| <i>APOL4</i>      | <i>C12orf54</i>     |
| <i>APOL6</i>      | <i>C13orf15</i>     |
| <i>ARID5B</i>     | <i>C18orf34</i>     |
| <i>ATF3</i>       | <i>C1orf192</i>     |
| <i>ATP2C2</i>     | <i>C1orf229</i>     |
| <i>BATF3</i>      | <i>C6orf10</i>      |
| <i>BCL2A1</i>     | <i>C9orf66</i>      |
| <i>BCL6</i>       | <i>CAGE1</i>        |
| <i>BCO2</i>       | <i>CAMKMT</i>       |
| <i>BDKRB2</i>     | <i>CAPS2</i>        |
| <i>BHLHE41</i>    | <i>CCDC148</i>      |
| <i>BICC1</i>      | <i>CCDC88B</i>      |
| <i>BIRC3</i>      | <i>CCNC</i>         |
| <i>BMP2</i>       | <i>CD200R1</i>      |
| <i>BSND</i>       | <i>CD37</i>         |
| <i>BTBD9</i>      | <i>CD5</i>          |
| <i>BTG3</i>       | <i>CENPN</i>        |
| <i>C10orf93</i>   | <i>CES1P1</i>       |
| <i>C11orf44</i>   | <i>CLEC1B</i>       |
| <i>C11orf96</i>   | <i>CLEC4GP1</i>     |
| <i>C12orf50</i>   | <i>CRYAA</i>        |
| <i>C15orf48</i>   | <i>CXCR4</i>        |
| <i>C1orf172</i>   | <i>DAPL1</i>        |
| <i>C1QTNF1</i>    | <i>DDIT4L</i>       |
| <i>C1R</i>        | <i>DIS3L2</i>       |
| <i>C1S</i>        | <i>DNAJB4</i>       |
| <i>C22orf33</i>   | <i>DYNLRB2</i>      |
| <i>C22orf41</i>   | <i>E2F2</i>         |
| <i>C2CD4A</i>     | <i>EGFL7</i>        |
| <i>C2CD4B</i>     | <i>EHD3</i>         |
| <i>C3</i>         | <i>EMX2</i>         |
| <i>C5orf49</i>    | <i>ETV1</i>         |
| <i>C5orf56</i>    | <i>FAM124B</i>      |
| <i>C6</i>         | <i>FAM201A</i>      |
| <i>C6orf58</i>    | <i>FAM26D</i>       |
| <i>C8orf4</i>     | <i>FAM53C</i>       |

---

|                |                     |
|----------------|---------------------|
| <i>CBLN4</i>   | <i>FAM69A</i>       |
| <i>CBR3</i>    | <i>FAM74A1</i>      |
| <i>CCL1</i>    | <i>FCRL3</i>        |
| <i>CCL11</i>   | <i>FGFR2</i>        |
| <i>CCL2</i>    | <i>FILIP1</i>       |
| <i>CCL20</i>   | <i>FLJ25328</i>     |
| <i>CCL3</i>    | <i>FMN2</i>         |
| <i>CCL4</i>    | <i>FOXP3</i>        |
| <i>CCL5</i>    | <i>FRY</i>          |
| <i>CCL7</i>    | <i>GATA4</i>        |
| <i>CCL8</i>    | <i>GFOD1</i>        |
| <i>CCRN4L</i>  | <i>GLYAT</i>        |
| <i>CD69</i>    | <i>GPR87</i>        |
| <i>CD70</i>    | <i>HOXA11-AS1</i>   |
| <i>CD83</i>    | <i>HOXA7</i>        |
| <i>CFB</i>     | <i>HOXC5</i>        |
| <i>CHDH</i>    | <i>HS3ST1</i>       |
| <i>CHST6</i>   | <i>HS6ST3</i>       |
| <i>CITED4</i>  | <i>HTR1D</i>        |
| <i>CLDN1</i>   | <i>IL16</i>         |
| <i>CLDN14</i>  | <i>KAZALD1</i>      |
| <i>CNTN2</i>   | <i>KHK</i>          |
| <i>CSF1</i>    | <i>KIF2B</i>        |
| <i>CSF2</i>    | <i>LOC100128164</i> |
| <i>CSF3</i>    | <i>LOC100129518</i> |
| <i>CTHRC1</i>  | <i>LOC100130157</i> |
| <i>CTSS</i>    | <i>LOC100130255</i> |
| <i>CX3CL1</i>  | <i>LOC100130452</i> |
| <i>CXCL1</i>   | <i>LOC100130876</i> |
| <i>CXCL10</i>  | <i>LOC100131089</i> |
| <i>CXCL2</i>   | <i>LOC100131581</i> |
| <i>CXCL3</i>   | <i>LOC158376</i>    |
| <i>CXCL5</i>   | <i>LOC282980</i>    |
| <i>CXCL6</i>   | <i>LOC284080</i>    |
| <i>CXCR7</i>   | <i>LOC286068</i>    |
| <i>CYLD</i>    | <i>LOC286071</i>    |
| <i>CYP1A1</i>  | <i>LOC401847</i>    |
| <i>CYP1B1</i>  | <i>LOC440117</i>    |
| <i>DDX58</i>   | <i>LOC644662</i>    |
| <i>DENND2D</i> | <i>LOC646034</i>    |
| <i>DLG2</i>    | <i>LOC647163</i>    |
| <i>DNAH5</i>   | <i>LRRC8B</i>       |
| <i>DNAJB9</i>  | <i>LYL1</i>         |
| <i>DNM1L</i>   | <i>LYPD1</i>        |
| <i>DRAM1</i>   | <i>MARVELD3</i>     |
| <i>DUSP16</i>  | <i>MBL1P</i>        |
| <i>EBI3</i>    | <i>MCHR2</i>        |
| <i>EDNRA</i>   | <i>MDFI</i>         |
| <i>EFCAB9</i>  | <i>MICU1</i>        |
| <i>EFNA1</i>   | <i>MTUS1</i>        |

---

---

|                 |                   |
|-----------------|-------------------|
| <i>EGFL6</i>    | <i>MUC12</i>      |
| <i>EGR2</i>     | <i>MYCN</i>       |
| <i>EGR3</i>     | <i>NCRNA00307</i> |
| <i>EGR4</i>     | <i>NCRNA00320</i> |
| <i>ELOVL7</i>   | <i>NEB</i>        |
| <i>EPB41</i>    | <i>NPIPL3</i>     |
| <i>ERAP1</i>    | <i>NUAK1</i>      |
| <i>ETS1</i>     | <i>ODF2L</i>      |
| <i>ETV3</i>     | <i>OR5B21</i>     |
| <i>ETV7</i>     | <i>OR9G4</i>      |
| <i>F3</i>       | <i>OTX1</i>       |
| <i>FAM101A</i>  | <i>PCBP3</i>      |
| <i>FAM122C</i>  | <i>PCDH15</i>     |
| <i>FAM129A</i>  | <i>PDE1C</i>      |
| <i>FAM150B</i>  | <i>PHTF2</i>      |
| <i>FAM155B</i>  | <i>PLB1</i>       |
| <i>FAM201B</i>  | <i>PNMAL1</i>     |
| <i>FBXO48</i>   | <i>PPFIBP2</i>    |
| <i>FCRL2</i>    | <i>PPM1H</i>      |
| <i>FGF18</i>    | <i>PRICKLE1</i>   |
| <i>FGF5</i>     | <i>PRO0611</i>    |
| <i>FILIP1L</i>  | <i>PRPS1</i>      |
| <i>FLJ10038</i> | <i>PSG9</i>       |
| <i>FLJ31104</i> | <i>RAD9B</i>      |
| <i>FLJ44674</i> | <i>RAET1E</i>     |
| <i>FOXF1</i>    | <i>RAG1</i>       |
| <i>FOXJ1</i>    | <i>RARB</i>       |
| <i>FSTL3</i>    | <i>RASSF9</i>     |
| <i>G0S2</i>     | <i>RD3</i>        |
| <i>GABRQ</i>    | <i>RIN1</i>       |
| <i>GBP1</i>     | <i>RNASE10</i>    |
| <i>GBP2</i>     | <i>RPL31P11</i>   |
| <i>GBP3</i>     | <i>SCD5</i>       |
| <i>GBP4</i>     | <i>SCNN1A</i>     |
| <i>GBP5</i>     | <i>SEMG1</i>      |
| <i>GCH1</i>     | <i>SERTAD4</i>    |
| <i>GFPT2</i>    | <i>SEZ6L</i>      |
| <i>GGTA1P</i>   | <i>SFRP2</i>      |
| <i>GJD3</i>     | <i>SFTPB</i>      |
| <i>GOT1L1</i>   | <i>SH3TC2</i>     |
| <i>GPR37L1</i>  | <i>SIRPD</i>      |
| <i>GPR68</i>    | <i>SNORA2B</i>    |
| <i>GRAMD3</i>   | <i>SOX18</i>      |
| <i>GVINP1</i>   | <i>SSTR1</i>      |
| <i>GXYLT2</i>   | <i>ST8SIA4</i>    |
| <i>GYPE</i>     | <i>TBX1</i>       |
| <i>HAS3</i>     | <i>TEX15</i>      |
| <i>HEY1</i>     | <i>THBD</i>       |
| <i>HGF</i>      | <i>TMEM100</i>    |
| <i>HIGD2B</i>   | <i>TMEM121</i>    |

---

---

|                     |                |
|---------------------|----------------|
| <i>HIVEP2</i>       | <i>TMEM41A</i> |
| <i>HOMER1</i>       | <i>TPD52L3</i> |
| <i>HOXB9</i>        | <i>TRIM45</i>  |
| <i>HS3ST3B1</i>     | <i>TRIOBP</i>  |
| <i>HTR3E</i>        | <i>TTC16</i>   |
| <i>ICAM1</i>        | <i>USH2A</i>   |
| <i>ICAM4</i>        | <i>YIF1B</i>   |
| <i>ICOSLG</i>       | <i>ZNF233</i>  |
| <i>IDO1</i>         | <i>ZNF253</i>  |
| <i>IER3</i>         | <i>ZNF30</i>   |
| <i>IFI30</i>        | <i>ZNF367</i>  |
| <i>IFIH1</i>        | <i>ZNF395</i>  |
| <i>IFIT5</i>        |                |
| <i>IFNGR2</i>       |                |
| <i>IL15</i>         |                |
| <i>IL15RA</i>       |                |
| <i>IL18R1</i>       |                |
| <i>IL18RAP</i>      |                |
| <i>IL1A</i>         |                |
| <i>IL1B</i>         |                |
| <i>IL36G</i>        |                |
| <i>IL6</i>          |                |
| <i>IL7R</i>         |                |
| <i>IL8</i>          |                |
| <i>INHBA</i>        |                |
| <i>IQCA1</i>        |                |
| <i>IRAK2</i>        |                |
| <i>IRF1</i>         |                |
| <i>IRX2</i>         |                |
| <i>ISG20</i>        |                |
| <i>JAM2</i>         |                |
| <i>KBTD8</i>        |                |
| <i>KCNN2</i>        |                |
| <i>KDM6B</i>        |                |
| <i>KIAA1199</i>     |                |
| <i>KIRREL2</i>      |                |
| <i>KLF6</i>         |                |
| <i>KLK10</i>        |                |
| <i>KRIT1</i>        |                |
| <i>KYNU</i>         |                |
| <i>LAD1</i>         |                |
| <i>LAMB3</i>        |                |
| <i>LAMC2</i>        |                |
| <i>LIF</i>          |                |
| <i>LITAF</i>        |                |
| <i>LOC100128644</i> |                |
| <i>LOC100128729</i> |                |
| <i>LOC100129104</i> |                |
| <i>LOC100130921</i> |                |
| <i>LOC100131015</i> |                |

---



---

*LOC100289255*  
*LOC100505599*  
*LOC100507410*  
*LOC144817*  
*LOC152024*  
*LOC283352*  
*LOC284570*  
*LOC285972*  
*LOC339240*  
*LOC389300*  
*LOC440896*  
*LOC644366*  
*LOC728228*  
*LOC729444*  
*LTB*  
*LYPD6*  
*MAP3K8*  
*MBP*  
*MIR155HG*  
*MMP1*  
*MMP10*  
*MS4A2*  
*MSC*  
*MSX1*  
*MTHFD2L*  
*MTMR7*  
*MYB*  
*MYO3A*  
*NAB1*  
*NAG20*  
*NAMPT*  
*NCOA7*  
*NEURL3*  
*NFKB1*  
*NFKBIA*  
*NFKBID*  
*NFKBIZ*  
*NINJ1*  
*NIPAL4*  
*NKD1*  
*NKD2*  
*NKX3-1*  
*NKX3-1*  
*NNMT*  
*NOD2*  
*NOV*  
*NR4A3*  
*NR6A1*  
*NRIP1*  
*NRXN1*

---

---

*NTN1*  
*NUAK2*  
*NUPL1*  
*ODZ1*  
*OOEP*  
*OR11H12*  
*OR5P2*  
*OSGIN2*  
*OXTR*  
*P2RY6*  
*PARD3*  
*PARP14*  
*PDE4DIP*  
*PDE5A*  
*PDGFRA*  
*PDLIM4*  
*PDZD2*  
*PDZD4*  
*PEG10*  
*PELI1*  
*PIM1*  
*PION*  
*PITPNC1*  
*PITX2*  
*PPAP2B*  
*PRINS*  
*PRRX1*  
*PSMB11*  
*PTGFR*  
*PTGS2*  
*PTPRC*  
*PTX3*  
*RASGRP1*  
*RCAN1*  
*RCSD1*  
*REL*  
*RELB*  
*RFPL4B*  
*RGS16*  
*RIPK2*  
*RND1*  
*RRAD*  
*RSPO3*  
*RTP4*  
*S100A14*  
*S100A3*  
*SAMD4A*  
*SAMD9L*  
*SAT1*  
*SAVI*

---

---

*SCARNA23*  
*SDC4*  
*SELE*  
*SEMA3C*  
*SERPINA3*  
*SERPINB13*  
*SERPINB2*  
*SERPINE2*  
*SETMAR*  
*SF3B2*  
*SGPP2*  
*SLC10A7*  
*SLC12A7*  
*SLC19A2*  
*SLC2A6*  
*SLC32A1*  
*SLC41A2*  
*SLC44A3*  
*SLC45A2*  
*SLC4A5*  
*SLC6A4*  
*SLC7A2*  
*SLCO4A1*  
*SMPX*  
*SNORD12B*  
*SOCS1*  
*SOD2*  
*SPON2*  
*SQRDL*  
*SRD5A2*  
*ST6GAL1*  
*STAT5A*  
*STC2*  
*STON2*  
*SYT9*  
*TAP1*  
*TCHH*  
*TDRD6*  
*TFAP2A*  
*TIAM2*  
*TIFA*  
*TLE1*  
*TLR2*  
*TMCO2*  
*TMEM106A*  
*TMEM217*  
*TMEM71*  
*TMPRSS9*  
*TNF*  
*TNFAIP2*

---

---

*TNFAIP3*  
*TNFAIP6*  
*TNFAIP8*  
*TNFRSF11B*  
*TNFSF10*  
*TNFSF9*  
*TNIP1*  
*TNIP3*  
*TPPP*  
*TRAF1*  
*TRAM1L1*  
*TRAPPC3*  
*TRIM36*  
*TRIM58*  
*TTC39A*  
*UBD*  
*UGCG*  
*UMODL1*  
*UPPI*  
*VCAM1*  
*VSTM1*  
*WTAP*  
*ZBTB10*  
*ZC3H12A*  
*ZC3H12C*  
*ZNF140*  
*ZNF391*  
*ZNF599*  
*ZNF664-FAM101A*

---

Supplementary Table S2. Genes that encode direct targets for known drugs and are upregulated by IL-1 $\beta$  in HCAEC. Data are from 3 independent array experiments.

| Gene symbol  | Target           | Type   | Drug | Effect            |            |
|--------------|------------------|--------|------|-------------------|------------|
| <i>PTGS2</i> | COX-2<br>(PTGS2) | Enzyme | 1    | Aceclofenac       | Inhibition |
|              |                  |        | 2    | Acemetacin        | Inhibition |
|              |                  |        | 3    | Apricoxib         | Inhibition |
|              |                  |        | 4    | Aspirin           | Inhibition |
|              |                  |        | 5    | Bromfenac         | Inhibition |
|              |                  |        | 6    | Butibufen         | Inhibition |
|              |                  |        | 7    | Celecoxib         | Inhibition |
|              |                  |        | 8    | Curcumin          | Inhibition |
|              |                  |        | 9    | Diflunisal        | Inhibition |
|              |                  |        | 10   | Droxicam          | Inhibition |
|              |                  |        | 11   | Etodolac          | Inhibition |
|              |                  |        | 12   | Etoricoxib        | Inhibition |
|              |                  |        | 13   | Fenbufen          | Inhibition |
|              |                  |        | 14   | Fenflumizol       | Inhibition |
|              |                  |        | 15   | Fenoprofen        | Inhibition |
|              |                  |        | 16   | Ibufenac          | Inhibition |
|              |                  |        | 17   | Ibuprofen         | Inhibition |
|              |                  |        | 18   | Ketorolac         | Inhibition |
|              |                  |        | 19   | Leflunomide       | Inhibition |
|              |                  |        | 20   | Lornoxicam        | Inhibition |
|              |                  |        | 21   | Loxoprofen        | Inhibition |
|              |                  |        | 22   | Lumiracoxib       | Inhibition |
|              |                  |        | 23   | Meclofenamic acid | Inhibition |
|              |                  |        | 24   | Meloxicam         | Inhibition |
|              |                  |        | 25   | Mesalazine        | Inhibition |
|              |                  |        | 26   | Metamizole        | Inhibition |
|              |                  |        | 27   | Nabumetone        | Inhibition |
|              |                  |        | 28   | NCX701            | Inhibition |
|              |                  |        | 29   | Nitroaspirin      | Inhibition |
|              |                  |        | 30   | Nitroflurbiprofen | Inhibition |
|              |                  |        | 31   | Parecoxib         | Inhibition |
|              |                  |        | 32   | Parsalmide        | Inhibition |
|              |                  |        | 33   | Phenacetin        | Inhibition |
|              |                  |        | 34   | Piroxicam         | Inhibition |
|              |                  |        | 35   | Rebamipide        | Activation |
|              |                  |        | 36   | Rofecoxib         | Inhibition |
|              |                  |        | 37   | Salsalate         | Inhibition |
|              |                  |        | 38   | Sulindac          | Inhibition |
|              |                  |        | 39   | Tarenflurbil      | Inhibition |
|              |                  |        | 40   | Tenidap           | Inhibition |
|              |                  |        | 41   | Tenoxicam         | Inhibition |
|              |                  |        | 42   | Terbogrel         | Inhibition |

|               |           |                 |    |                       |            |
|---------------|-----------|-----------------|----|-----------------------|------------|
|               |           |                 | 43 | Tiaprofenic acid      | Inhibition |
|               |           |                 | 44 | Tilmacoxib            | Inhibition |
|               |           |                 | 45 | Timegadine            | Inhibition |
|               |           |                 | 46 | Tolfenamic acid       | Inhibition |
|               |           |                 | 47 | Tolmetin              | Inhibition |
|               |           |                 | 48 | Trisalicylate         | Inhibition |
|               |           |                 | 49 | Valdecoxib            | Inhibition |
|               |           |                 | 50 | Zaltoprofen           | Inhibition |
|               |           |                 | 51 | Zomepirac             | Inhibition |
| <i>SLC6A4</i> | SERT      | Solute carrier  | 1  | Amoxapine             | Inhibition |
|               |           |                 | 2  | Bicifadine            | Inhibition |
|               |           |                 | 3  | Clomipramine          | Inhibition |
|               |           |                 | 4  | DOV216303             | Inhibition |
|               |           |                 | 5  | Duloxetine            | Inhibition |
|               |           |                 | 6  | Fluvoxamine           | Inhibition |
|               |           |                 | 7  | Iometopane<br>(123I)  | Inhibition |
|               |           |                 | 8  | Minaprine             | Inhibition |
|               |           |                 | 9  | Nefazodone            | Inhibition |
|               |           |                 | 10 | NS2359                | Inhibition |
|               |           |                 | 11 | Paroxetine            | Inhibition |
|               |           |                 | 12 | Prazepine             | Inhibition |
|               |           |                 | 13 | Sertraline            | Inhibition |
|               |           |                 | 14 | Sibutramine           | Inhibition |
|               |           |                 | 15 | Trazodone             | Inhibition |
|               |           |                 | 16 | Venlafaxine           | Inhibition |
| <i>TNF</i>    | TNF-alpha | Receptor ligand | 1  | Adalimumab            | Inhibition |
|               |           |                 | 2  | Aloperine             | Inhibition |
|               |           |                 | 3  | AME527                | Inhibition |
|               |           |                 | 4  | Calcitriol            | Inhibition |
|               |           |                 | 5  | CB1093                | Inhibition |
|               |           |                 | 6  | CDP571                | Inhibition |
|               |           |                 | 7  | Certolizumab<br>pegol | Inhibition |
|               |           |                 | 8  | Doxycycline           | Inhibition |
|               |           |                 | 9  | Etanercept            | Inhibition |
|               |           |                 | 10 | Genz-29155            | Inhibition |
|               |           |                 | 11 | Golimumab             | Inhibition |
|               |           |                 | 12 | Infliximab            | Inhibition |
|               |           |                 | 13 | Lenalidomide          | Inhibition |
|               |           |                 | 14 | Onercept              | Inhibition |
|               |           |                 | 15 | Pegsunercept          | Inhibition |
|               |           |                 | 16 | Thalidomide           | Inhibition |
| <i>EDNRA</i>  | EDNRA     | Receptor        | 1  | Ambrisentan           | Inhibition |
|               |           |                 | 2  | Atrasentan            | Inhibition |
|               |           |                 | 3  | Avosentan             | Inhibition |
|               |           |                 | 4  | BMS-193884            | Inhibition |

|               |                  |                 |    |                              |            |
|---------------|------------------|-----------------|----|------------------------------|------------|
|               |                  |                 | 5  | Darusentan                   | Inhibition |
|               |                  |                 | 6  | Enrasentan                   | Inhibition |
|               |                  |                 | 7  | Macitentan                   | Inhibition |
|               |                  |                 | 8  | Nebentan                     | Inhibition |
|               |                  |                 | 9  | Sitaxentan                   | Inhibition |
|               |                  |                 | 10 | Sparsentan                   | Inhibition |
|               |                  |                 | 11 | TBC3711                      | Inhibition |
|               |                  |                 | 12 | Tezosentan                   | Inhibition |
|               |                  |                 | 13 | Zibotentan                   | Inhibition |
| <i>PDE5A</i>  | PDE5A            | Enzyme          | 1  | Avanafil                     | Inhibition |
|               |                  |                 | 2  | Ibudilast                    | Inhibition |
|               |                  |                 | 3  | OSI461                       | Inhibition |
|               |                  |                 | 4  | Sildenafil                   | Inhibition |
|               |                  |                 | 5  | SLx2101                      | Inhibition |
|               |                  |                 | 6  | Tadalafil                    | Inhibition |
|               |                  |                 | 7  | Udenafil                     | Inhibition |
|               |                  |                 | 8  | Vardenafil                   | Inhibition |
| <i>PDGFRA</i> | PDGF-R-<br>alpha | Receptor        | 1  | Cediranib                    | Inhibition |
|               |                  |                 | 2  | Imatinib                     | Inhibition |
|               |                  |                 | 3  | Nintedanib                   | Inhibition |
|               |                  |                 | 4  | Sunitinib                    | Inhibition |
|               |                  |                 | 5  | XL999                        | Inhibition |
| <i>IL6</i>    | IL-6             | Receptor ligand | 1  | Aloperine                    | Inhibition |
|               |                  |                 | 2  | Dexamethasone                | Inhibition |
|               |                  |                 | 3  | PF04236921                   | Inhibition |
|               |                  |                 | 4  | Siltuximab                   | Inhibition |
|               |                  |                 | 5  | Sirukumab                    | Inhibition |
| <i>IL1B</i>   | IL-1<br>beta     | Receptor ligand | 1  | Aloperine                    | Inhibition |
|               |                  |                 | 2  | Canakinumab                  | Inhibition |
|               |                  |                 | 3  | Doxycycline                  | Inhibition |
|               |                  |                 | 4  | Gevokizumab                  | Inhibition |
| <i>MMP1</i>   | MMP-1            | Enzyme          | 1  | Batimastat                   | Inhibition |
|               |                  |                 | 2  | Doxycycline                  | Inhibition |
|               |                  |                 | 3  | Marimastat                   | Inhibition |
|               |                  |                 | 4  | Rebimastat                   | Inhibition |
| <i>SRD5A2</i> | S5AR2            | Enzyme          | 1  | Androstanolone               | Inhibition |
|               |                  |                 | 2  | Dutasteride                  | Inhibition |
|               |                  |                 | 3  | Finasteride                  | Inhibition |
|               |                  |                 | 4  | Izonsteride                  | Inhibition |
| <i>PTGFR</i>  | PGF2aR           | Receptor        | 1  | (Z)-Unoprostone<br>isopropyl | Activation |
|               |                  |                 | 2  | Bimatoprost                  | Activation |
|               |                  |                 | 3  | Travoprost                   | Activation |

---

|               |                             |                         |   |                                   |             |
|---------------|-----------------------------|-------------------------|---|-----------------------------------|-------------|
| <i>CSF2</i>   | GM-CSF                      | Receptor ligand         | 1 | Bamirastine                       | Inhibition  |
|               |                             |                         | 2 | KB002                             | Inhibition  |
|               |                             |                         | 3 | MT203                             | Inhibition  |
| <i>IL1A</i>   | IL-1<br>alpha               | Receptor ligand         | 1 | Bamirastine                       | Inhibition  |
|               |                             |                         | 2 | Doxycycline                       | Inhibition  |
| <i>BDKRB2</i> | BDKRB2                      | Receptor                | 1 | Anatibant                         | Inhibition  |
|               |                             |                         | 2 | Labradimil                        | Activation  |
| <i>CTSS</i>   | CTSS                        | Enzyme                  | 1 | CRA028129                         | Inhibition  |
| <i>ETS1</i>   | ETS-1                       | Transcription<br>factor | 1 | Estradiol                         | Inhibition  |
| <i>HGF</i>    | HGF                         | Receptor ligand         | 1 | Rilotumumab                       | Inhibition  |
| <i>NFKB1</i>  | NFkB1<br>(p105)             | Transcription<br>factor | 1 | OT551                             | Inhibition  |
| <i>PIM1</i>   | Pim-1                       | Enzyme                  | 1 | SGI-1776                          | Inhibition  |
| <i>REL</i>    | c-Rel<br>(NF-kB<br>subunit) | Transcription<br>factor | 1 | Apilimod                          | Inhibition  |
| <i>SAT1</i>   | SSAT                        | Enzyme                  | 1 | N(1),N(11)-<br>Diethylnorspermine | Unspecified |

---



Supplementary Table S3. Genes that encode direct targets for known drugs and are downregulated by IL-1 $\beta$  in HCAEC. Data are from 3 independent array experiments.

| Gene symbol   | Target     | Type                                  | Drug | Effect            |             |
|---------------|------------|---------------------------------------|------|-------------------|-------------|
| <i>HTR1D</i>  | HTR1D      | Receptor                              | 1    | Almotriptan       | Activation  |
|               |            |                                       | 2    | Dihydroergotamine | Activation  |
|               |            |                                       | 3    | Frovatriptan      | Activation  |
|               |            |                                       | 4    | Ketanserin        | Inhibition  |
|               |            |                                       | 5    | Naratriptan       | Activation  |
|               |            |                                       | 6    | Rizatriptan       | Activation  |
|               |            |                                       | 7    | Sumatriptan       | Activation  |
|               |            |                                       | 8    | Ziprasidone       | Unspecified |
|               |            |                                       | 9    | Zolmitriptan      | Activation  |
| <i>RARB</i>   | RARbeta    | Transcription factor/nuclear receptor | 1    | Adapalene         | Activation  |
|               |            |                                       | 2    | Etretinate        | Activation  |
|               |            |                                       | 3    | Retinoic acid     | Activation  |
|               |            |                                       | 4    | Tamibarotene      | Activation  |
|               |            |                                       | 5    | Tazarotene        | Activation  |
| <i>CXCR4</i>  | CXCR4      | Receptor                              | 1    | Burixafor         | Inhibition  |
|               |            |                                       | 2    | CTCE9908          | Inhibition  |
|               |            |                                       | 3    | Plerixafor        | Inhibition  |
| <i>FGFR2</i>  | FGFR2      | Receptor                              | 1    | Cediranib         | Inhibition  |
| <i>SCNN1A</i> | alpha-ENaC | Sodium channel subunit                | 1    | Amiloride         | Inhibition  |

Supplementary Table S4. The targets of most significant pathways regulated by 4 h IL-1 $\beta$  treatment in HCAEC. Data are from 3 independent array experiments.

| Targets                                            | Regulation  |
|----------------------------------------------------|-------------|
| C3 <sup>a, e, j</sup>                              | Upregulated |
| CCL2 <sup>a, b, c, e, h</sup>                      | Upregulated |
| CX3CL1 <sup>a</sup>                                | Upregulated |
| ENA-78 ( <i>CXCL5</i> ) <sup>b, c</sup>            | Upregulated |
| HGF <sup>e</sup>                                   | Upregulated |
| ICAM1 <sup>a, c, d, e, f, g, h</sup>               | Upregulated |
| I-kB ( <i>NFKBID</i> ) <sup>b, c, d, f, h, i</sup> | Upregulated |
| IL-1 alpha <sup>b, e, f, h</sup>                   | Upregulated |
| IL-1 beta <sup>a, b, c, e, f, g, h, i</sup>        | Upregulated |
| IL-6 <sup>a, b, c, d, e, f, g, h</sup>             | Upregulated |
| IL-8 <sup>a, b, c, d, e, f, g, h</sup>             | Upregulated |
| A20 ( <i>TNFAIP3</i> ) <sup>a</sup>                | Upregulated |
| C6 <sup>j</sup>                                    | Upregulated |
| CCL20 <sup>c</sup>                                 | Upregulated |
| CCL5 <sup>a, b, e, g</sup>                         | Upregulated |
| CCL7 <sup>c</sup>                                  | Upregulated |
| c-IAP2 ( <i>BIRC3</i> ) <sup>i</sup>               | Upregulated |
| COX-2 ( <i>PTGS2</i> ) <sup>c, d, h</sup>          | Upregulated |
| CSF1 <sup>a, e</sup>                               | Upregulated |
| E-selectin ( <i>SELE</i> ) <sup>e, g, h</sup>      | Upregulated |
| ETS1 <sup>d</sup>                                  | Upregulated |
| F3 <sup>e, f, g</sup>                              | Upregulated |
| Factor B ( <i>CFB</i> ) <sup>j</sup>               | Upregulated |
| GCP2 ( <i>CXCL6</i> ) <sup>c</sup>                 | Upregulated |
| G-CSF ( <i>CSF3</i> ) <sup>c</sup>                 | Upregulated |
| GM-CSF ( <i>CSF2</i> ) <sup>a, b, c, e, g</sup>    | Upregulated |
| GRO-1 ( <i>CXCL1</i> ) <sup>a, c</sup>             | Upregulated |
| GRO-2 ( <i>CXCL2</i> ) <sup>a</sup>                | Upregulated |
| GRO-3 ( <i>CXCL3</i> ) <sup>a</sup>                | Upregulated |
| IL-18R1 <sup>h</sup>                               | Upregulated |
| IL18RAP <sup>h</sup>                               | Upregulated |
| IP10 ( <i>CXCL10</i> ) <sup>a, b</sup>             | Upregulated |
| IRAK2 <sup>i</sup>                                 | Upregulated |
| IRF1 <sup>a</sup>                                  | Upregulated |
| MDA-5 ( <i>IFIH1</i> ) <sup>a</sup>                | Upregulated |
| MIP-1-alpha ( <i>CCL3</i> ) <sup>a, b, f, g</sup>  | Upregulated |
| MIP-1-beta ( <i>CCL4</i> ) <sup>b, f</sup>         | Upregulated |
| MMP-1 <sup>a, c, d</sup>                           | Upregulated |
| NF-kB <sup>a, c, d, e, f, g, h, i</sup>            | Upregulated |
| NF-kB p50/p50 <sup>b</sup>                         | Upregulated |
| NF-kB1 (p105) <sup>i</sup>                         | Upregulated |
| NF-kB1 (p50) <sup>b, i</sup>                       | Upregulated |
| NFKBIA <sup>d, f</sup>                             | Upregulated |
| Pellino 1 ( <i>PELI1</i> ) <sup>i</sup>            | Upregulated |
| PTX3 <sup>j</sup>                                  | Upregulated |
| RelB (NF-kB subunit) <sup>i</sup>                  | Upregulated |

|                                             |             |
|---------------------------------------------|-------------|
| RIG-I ( <i>DDX58</i> ) <sup>a</sup>         | Upregulated |
| TLR2 <sup>f, i</sup>                        | Upregulated |
| TNF-alpha <sup>a, b, d, e, f, g, h, i</sup> | Upregulated |
| VCAM1 <sup>a, d, e, f, g, h</sup>           | Upregulated |

<sup>a</sup>Regulated in 'Glomerular injury in Lupus Nephritis' pathway

<sup>b</sup>Regulated in 'PDE4 regulation of cyto/chemokine expression in arthritis' pathway

<sup>c</sup>Regulated in 'Immune response-IL-17 signaling pathways' pathway

<sup>d</sup>Regulated in 'Immune response-MIF-mediated glucocorticoid regulation' pathway

<sup>e</sup>Regulated in 'Vascular endothelial cell damage in SLE' pathway

<sup>f</sup>Regulated in 'Immune response\_HMGB1/RAGE signaling pathway'

<sup>g</sup>Regulated in 'Substance P-mediated inflammation and pain in Sickle cell disease' pathway

<sup>h</sup>Regulated in 'Immune response\_IL-18 signaling' pathway

<sup>i</sup>Regulated in 'Signal transduction\_NF-kB activation pathways'

<sup>j</sup>Regulated in 'Immune response\_Alternative complement pathway'

Supplementary Table S5. GO listing of disease states in which either HGF or IL-1 $\beta$  are involved.

| Pathological states associated with only HGF | Pathological states associated with only IL-1 $\beta$ |
|----------------------------------------------|-------------------------------------------------------|
| Adenocarcinoma                               | Abortion, Habitual                                    |
| Adenoma                                      | Abortion, Spontaneous                                 |
| Amyloidosis                                  | Achlorhydria                                          |
| Amyotrophic Lateral Sclerosis                | Acute Kidney Injury                                   |
| Astrocytoma                                  | Aggressive Periodontitis                              |
| Breast Diseases                              | Alcoholism                                            |
| Carcinoma, Lobular                           | Alopecia Areata                                       |
| Carcinoma, Renal Cell                        | Alzheimer Disease                                     |
| Carcinoma, Squamous Cell                     | Alzheimer disease, early onset                        |
| Carotid Artery Diseases                      | Alzheimer disease, late onset                         |
| Cerebral Infarction                          | Anemia                                                |
| Cholesteatoma                                | Anemia, Sickle Cell                                   |
| Cicatrix                                     | Apnea                                                 |
| Diabetic Retinopathy                         | Appendicitis                                          |
| Emphysema                                    | Arterial Occlusive Diseases                           |
| Endometrial Neoplasms                        | Arthritis, Juvenile                                   |
| Gingival Overgrowth                          | Arthritis, Psoriatic                                  |
| Gliosis                                      | Arthritis, Reactive                                   |
| Head and Neck Neoplasms                      | Arthritis, Rheumatoid                                 |
| Hearing Loss                                 | Asbestosis                                            |
| Hepatitis, Alcoholic                         | Aspergillosis                                         |
| Hernia                                       | Asthma                                                |
| Hernia, Inguinal                             | Atrophy                                               |
| Hyperplasia                                  | Behcet Syndrome                                       |
| Hypertrophy                                  | Biliary Atresia                                       |
| Hypopharyngeal Neoplasms                     | Bipolar Disorder                                      |
| Infarction                                   | Bone Resorption                                       |
| Kidney Neoplasms                             | Brain Ischemia                                        |
| Leukemia, Lymphocytic, Chronic, B-Cell       | Bronchial Diseases                                    |
| Liver Neoplasms                              | Bronchopulmonary Dysplasia                            |
| Lung Diseases                                | Burning Mouth Syndrome                                |
| Lymphedema                                   | Cachexia                                              |
| Meningioma                                   | Calculi                                               |
| Motor Neuron Disease                         | Carcinoma, Bronchogenic                               |
| Mouth Neoplasms                              | Carcinoma, Lewis Lung                                 |
| Moyamoya Disease                             | Cardiovascular Diseases                               |
| Myopia                                       | Celiac Disease                                        |
| Myopia, Degenerative                         | Cholangiocarcinoma                                    |
| Nasopharyngeal Neoplasms                     | Cholangitis, Sclerosing                               |
| Neurilemmoma                                 | Chorioamnionitis                                      |
| Neurofibromatosis 1                          | Chronic Periodontitis                                 |
| Oligodendroglioma                            | Coronary Artery Disease                               |
| Osteoarthritis                               | Coronary Disease                                      |
|                                              | Coronary Restenosis                                   |
|                                              | Cranio cerebral Trauma                                |

---

|                              |                              |
|------------------------------|------------------------------|
| Peripheral Nervous System-   | Crohn Disease                |
| Neoplasms                    | Cystic Fibrosis              |
| Pituitary Neoplasms          | Dementia                     |
| Pleural Neoplasms            | Dengue                       |
| Pneumonia                    | Depressive Disorder, Major   |
| Poisoning                    | Dermatitis                   |
| Pulmonary Embolism           | Dermatitis, Allergic Contact |
| Pulmonary Fibrosis           | Dermatitis, Atopic           |
| Renal Insufficiency          | Dermatitis, Contact          |
| Retinal Neovascularization   | Dermatitis, Irritant         |
| Rhabdomyosarcoma             | Dermatomyositis              |
| Sarcoma, Alveolar Soft Part  | Diabetes Mellitus            |
| Sclerosis                    | Diabetes Mellitus, Type 1    |
| Skin Neoplasms               | Diabetes Mellitus, Type 2    |
| Skin Ulcer                   | Diabetes, Gestational        |
| Spinal Cord Neoplasms        | Diabetic Nephropathies       |
| Thromboembolism              | Duodenal Ulcer               |
| Thyroid Carcinoma, Papillary | Dyspepsia                    |
| Ulcer                        | Dysthymic Disorder           |
|                              | Epilepsy                     |
|                              | Epilepsy, Temporal Lobe      |
|                              | Esophageal Neoplasms         |
|                              | Esophagitis                  |
|                              | Esophagitis, Peptic          |
|                              | Familial Mediterranean Fever |
|                              | Fever                        |
|                              | Fibroma                      |
|                              | Gallstones                   |
|                              | Gastritis                    |
|                              | Gastritis, Atrophic          |
|                              | Gastrointestinal Diseases    |
|                              | Gingivitis                   |
|                              | Glaucoma                     |
|                              | Glaucoma, Open-Angle         |
|                              | Glomerulonephritis, IGA      |
|                              | Glossitis                    |
|                              | Glossitis, Benign Migratory  |
|                              | Gout                         |
|                              | Graft vs Host Disease        |
|                              | Graves Disease               |
|                              | Hallucinations               |
|                              | Heartburn                    |
|                              | Helicobacter Infections      |
|                              | Hemophilia A                 |
|                              | Hemorrhage                   |
|                              | Hepatitis B                  |
|                              | Hepatitis B, Chronic         |
|                              | Histiocytosis                |
|                              | HIV Infections               |
|                              | HTLV-I Infections            |

---

---

Huntington Disease  
Hyperoxia  
Hypersensitivity, Immediate  
Hypothermia  
Hypoxia-Ischemia, Brain  
Inflammatory Breast Neoplasms  
Intervertebral Disc Displacement  
Intestinal Diseases  
Intestinal Neoplasms  
Jaundice  
Keratoconjunctivitis Sicca  
Keratoconus  
Kidney Failure, Chronic  
Leukemia, Megakaryoblastic, Acute  
Leukemoid Reaction  
Lichen Planus  
Lichen Planus, Oral  
Liver Cirrhosis, Alcoholic  
Liver Cirrhosis, Biliary  
Lupus Nephritis  
Lyme Disease  
Lymphoma, B-Cell, Marginal Zone  
Malaria  
Malaria, Cerebral  
Malaria, Falciparum  
Malnutrition  
Maxillary Neoplasms  
Meningococcal Infections  
Metabolic Syndrome X  
Mevalonate Kinase Deficiency  
Mitral Valve Prolapse  
Multiple Sclerosis  
Multiple Sclerosis, Chronic Progressive  
Multiple Sclerosis, Relapsing-Remitting  
Muscular Diseases  
Myelodysplastic Syndromes  
Nasal Polyps  
Neck Injuries  
Necrosis  
Nephrotic Syndrome  
Neuroblastoma  
Neurofibroma, Plexiform  
Ossification of Posterior Longitudinal  
Ligament  
Osteitis Deformans  
Osteoarthritis, Knee  
Osteonecrosis  
Osteoporosis, Postmenopausal  
Otitis  
Otitis Media

---

---

Otitis Media with Effusion  
Overweight  
Pancreatitis  
Papillomavirus Infections  
Paraproteinemias  
Parkinson Disease  
Pemphigoid, Bullous  
Pemphigus  
Periodontitis  
Pneumoconiosis  
Premature Birth  
Prostatic Hyperplasia  
Psoriasis  
Purpura  
Purpura, Schoenlein-Henoch  
Purpura, Thrombocytopenic, Idiopathic  
Q Fever  
Raynaud Disease  
Respiratory Distress Syndrome, Adult  
Respiratory Tract Infections  
Retinoblastoma  
Rhinitis, Allergic, Perennial  
Root Resorption  
Sarcoidosis  
Schizophrenia  
Sepsis  
Severe Dengue  
Shock, Septic  
Silicosis  
Sinusitis  
Sjogren's Syndrome  
Sleep Apnea, Obstructive  
Spinal Osteophytosis  
Spondylitis, Ankylosing  
Stomach Diseases  
Stomach Ulcer  
Stomatitis  
Stomatitis, Aphthous  
Stroke  
Subarachnoid Hemorrhage  
Tenosynovitis  
Thyroid Diseases  
Thyroiditis, Subacute  
Tooth Diseases  
Tooth Loss  
Tuberculosis  
Tuberculosis, Pulmonary  
Tumor Virus Infections  
Uterine Neoplasms  
Vaginal Diseases

---

---

Vaginosis, Bacterial  
Vasculitis  
Venous Thrombosis  
Vulvar Neoplasms  
Waldenstrom Macroglobulinemia  
Zollinger-Ellison Syndrome

---



Supplementary Table S6. GO listing of disease states in which both HGF and IL-1 $\beta$  are involved.

---

Pathological states common where both IL-1 $\beta$  and HGF are involved

---

Alveolar Bone Loss  
 Arteriosclerosis  
 Arthritis  
 Bacterial Infections  
 Brain Injuries  
 Breast Neoplasms  
 Carcinoma  
 Carcinoma, Ductal, Breast  
 Carcinoma, Hepatocellular  
 Carcinoma, Non-Small-Cell Lung  
 Colitis, Ulcerative  
 Colonic Neoplasms  
 Colorectal Neoplasms  
 Dry Eye Syndromes  
 Endometriosis  
 Fibrosis  
 Glioblastoma  
 Glioma  
 Hepatitis  
 Hepatitis C  
 Hepatitis C, Chronic  
 Hepatitis, Chronic  
 Hypertension  
 Hypoxia  
 Idiopathic Pulmonary Fibrosis  
 Infection  
 Inflammation  
 Inflammatory Bowel Diseases  
 Insulin Resistance  
 Leukemia  
 Leukemia, Myeloid  
 Leukemia, Myeloid, Acute  
 Liver Cirrhosis  
 Lung Neoplasms  
 Lupus Erythematosus, Systemic  
 Lymphoma  
 Lymphoma, Non-Hodgkin  
 Medulloblastoma  
 Melanoma  
 Melanoma, Cutaneous Malignant  
 Melanoma, Uveal  
 Monoclonal Gammopathy of Undetermined Significance  
 Mucocutaneous Lymph Node Syndrome  
 Multiple Myeloma  
 Myocardial Infarction  
 Neoplasm Metastasis

---

---

Neoplasms  
Obesity  
Osteoporosis  
Ovarian Neoplasms  
Pancreatic Neoplasms  
Periodontal Diseases  
Prostatic Neoplasms  
Pulmonary Disease, Chronic Obstructive  
Rectal Neoplasms  
Sarcoma  
Sarcoma, Synovial  
Scleroderma, Systemic  
Small Cell Lung Carcinoma  
Sprains and Strains  
Stomach Neoplasms  
Systemic Inflammatory Response Syndrome  
Thrombosis  
Thyroid Neoplasms  
Urinary Bladder Neoplasms  
Uterine Cervical Neoplasms  
Wounds and Injuries

---

Supplementary Table S7. GO listing of pathways associated with HGF.

| Pathway map                                                                                              | Map type  |
|----------------------------------------------------------------------------------------------------------|-----------|
| Cell adhesion_PLAU signaling                                                                             | Normal    |
| Colorectal cancer (general schema)                                                                       | Pathology |
| Cytoskeleton remodeling_Hyaluronic acid/ CD44 signaling pathways                                         | Normal    |
| Development_Growth factors in regulation of oligodendrocyte precursor cell proliferation                 | Normal    |
| Development_HGF signaling pathway                                                                        | Normal    |
| Development_HGF-dependent inhibition of TGF-beta-induced EMT                                             | Normal    |
| Development_PIP3 signaling in cardiac myocytes                                                           | Normal    |
| Development_Regulation of epithelial-to-mesenchymal transition (EMT)                                     | Normal    |
| Development_Role of HGF in hematopoietic stem cell mobilization                                          | Normal    |
| Immune response_PGE2 signaling in immune response                                                        | Normal    |
| Ovarian cancer (main signaling cascades)                                                                 | Pathology |
| Resolution of inflammation in healing myocardial infarction                                              | Pathology |
| Role of alpha-6/beta-4 integrins in carcinoma progression                                                | Pathology |
| Role of growth factor receptors transactivation by Hyaluronic acid / CD44 signaling in tumor progression | Pathology |
| Transcription_Hypoxia- and receptor-mediated HIF-1 activation                                            | Normal    |
| Transport_Macropinocytosis regulation by growth factors                                                  | Normal    |
| Vascular endothelial cell damage in SLE                                                                  | Pathology |
| wtCFTR and deltaF508 traffic / Membrane expression (normal and CF)                                       | Pathology |

Supplementary Table S8. Targets involved in 'Lupus Erythematosus, Systemic' that were regulated by IL-1 $\beta$  in HCAEC as listed by Metacore GO biomarker assessment work flow centering immune system diseases. Data are from 3 independent array experiments.

---

Targets

---

ARID5B  
BCL6  
BCO2  
BIRC3  
C1R  
C3  
C5orf56  
C6orf10  
CAPS2  
CCL2  
CCL20  
CCL3  
CCL4  
CCL5  
CD5  
CD69  
CD70  
CD83  
CFB  
CSF1  
CSF2  
CX3CL1  
CXCL1  
CXCL2  
CXCL10  
CXCR4  
CYP1A1  
DDX58  
EBI3  
EGFL7  
ERC2  
ETS1  
F3  
FCRL3  
FOXJ1  
FOXP3  
HGF  
ICAM1  
ICOSLG  
IFIH1  
IFIT5  
IFNGR2  
IL15  
IL16

---

---

IL18R1  
IL1A  
IL1B  
IL6  
IL7R  
IL8  
INHBA  
ISG20  
KIF6  
MBP  
MMP1  
MS4A2  
NAMPT  
NFKB1  
NFKBIA  
NOD2  
ODZ1  
PARP14  
PDLIM4  
PTGS2  
PTPRC  
PTX3  
RASGRP1  
REL  
RELB  
RIPK2  
SAMMD9L  
SELE  
SERPINB2  
SLC6A4  
SOCS1  
SOD2  
STAT5A  
TAP1  
THBD  
TIFA  
TLR2  
TNF  
TNFAIP3  
TNFRSF11B  
TNFSF10  
TNIP1  
TRAF1  
VCAM1

---

Supplementary Figure S1. The ten biological pathways most significantly ( $P < 0.05$ ) regulated by 4 h IL-1 $\beta$  treatment in HCAEC. Pathways represented as histograms are ranked by the  $-\log$  value ( $P$  value). Data are from 3 independent experiments.

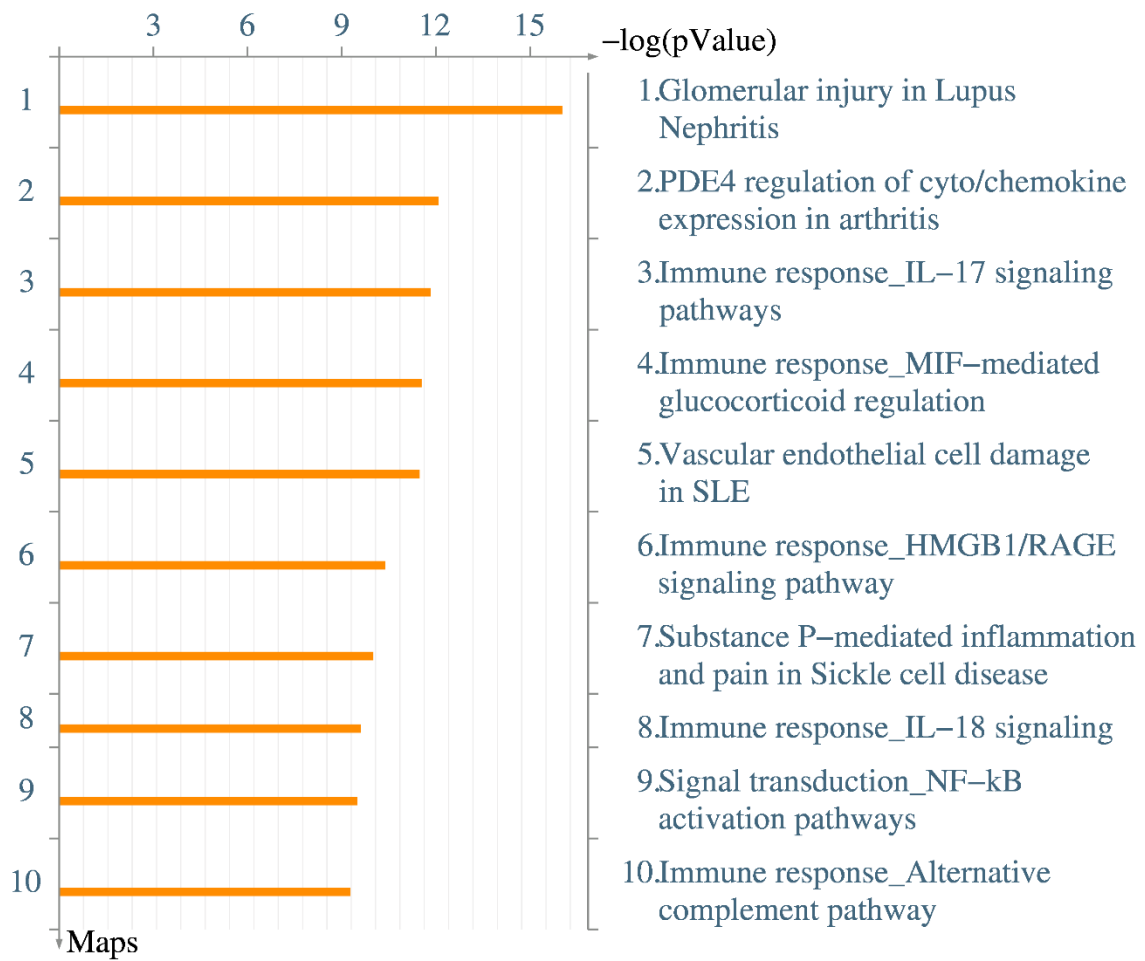

Supplementary Figure S2. Metacore™ GO biomarker assessment work flow centering immune system diseases showing the top 10 disease profiles enriched in 4 h IL-1 $\beta$  transcriptome. Diseases represented as histograms are ranked by the  $-\log$  value ( $P$  value). Data are from 3 independent experiments.

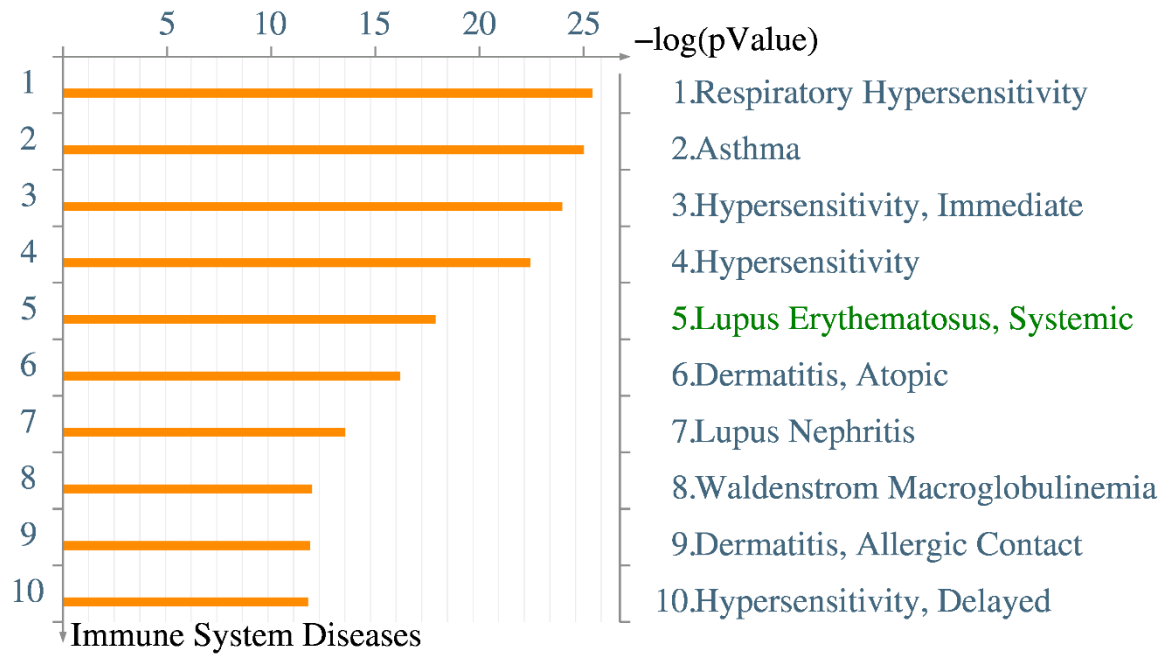

Supplement: Data_Sheet_1.pdf [file Data_Sheet_1.pdf]
